# Supplementary material for: Magnetic, recyclable PtyCo1−y/Ti3C2X2 (X = O, F) catalyst: a facile synthesis and enhanced catalytic activity for hydrogen generation from the hydrolysis of ammonia borane
Source: Royal Society of Chemistry journal article supplement (doi:10.1039/c6nj02695h), 2017-01-01
Supplement: c6nj02695h1.pdf [file c6nj02695h1.pdf]

## Electronic Supplementary Information

### **Magnetic recyclable $\text{Pt}_y\text{Co}_{1-y}/\text{Ti}_3\text{C}_2\text{X}_2$ (X=O, F) catalyst: a facile synthesis, enhanced catalytic activity for hydrogen generation from the hydrolysis of ammonia borane**

Guangyin Fan<sup>a,\*</sup>, Xiaojing Li<sup>b</sup>, Yuling Ma<sup>a</sup>, Yun Zhang<sup>a,\*</sup>, Jiangtao Wu<sup>a</sup>, Bin Xu<sup>c</sup>, Ting Sun<sup>a</sup>, Daojiang Gao<sup>a</sup>, and Jian Bi<sup>a</sup>

<sup>a</sup> College of Chemistry and Materials Science, Sichuan Normal University, Chengdu, 610068, P.R. China.

<sup>b</sup> College of Chemistry and Chemical Engineering, China West Normal University, Nanchong 637009, P.R. China.

<sup>c</sup> School of Chemical and Pharmaceutical Engineering, Sichuan University of Science & Engineering, Zigong 643000, P.R. China.

This file includes supplementary Fig. S1 and S2.

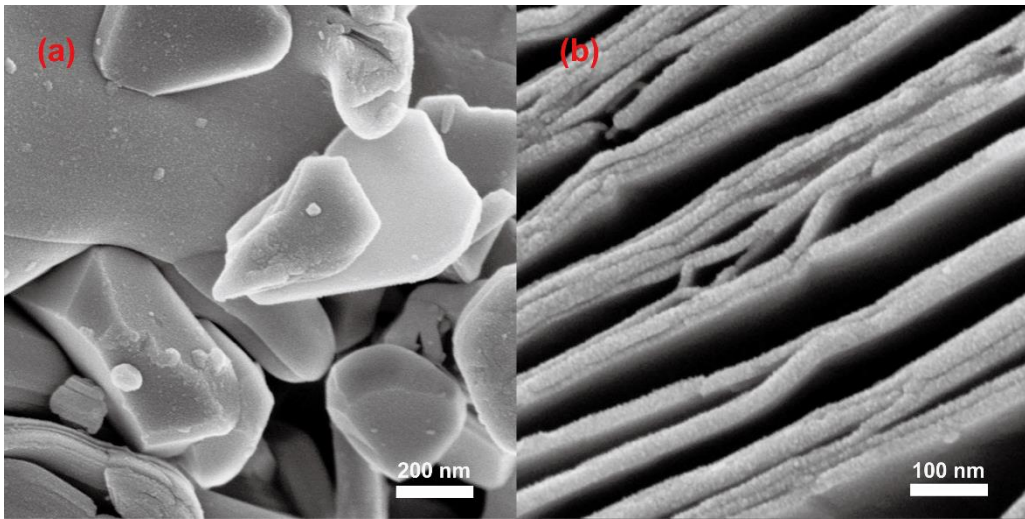

Fig.S1 SEM images of Ti<sub>3</sub>AlC<sub>2</sub> (a) and Ti<sub>3</sub>C<sub>2</sub>X<sub>2</sub> (b).

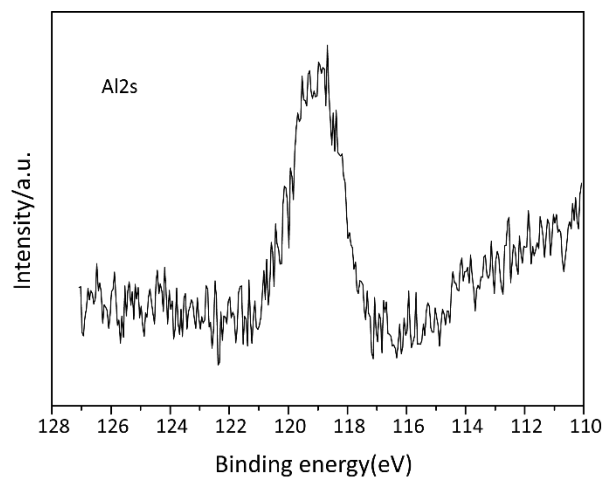

Fig.S2. High resolution XPS spectrum of Al<sub>2s</sub> for Pt<sub>0.08</sub>Co<sub>0.92</sub>/Ti<sub>3</sub>C<sub>2</sub>X<sub>2</sub> sample.
